# Supplementary material for: Acid-responsive singlet oxygen nanodepots
Source: Royal Society of Chemistry journal article supplement (doi:10.1039/d4sc06553k), 2024-12-04
Supplement: d4sc06553k1.pdf [file d4sc06553k1.pdf]

## Supporting Information

### Acid-Responsive Singlet Oxygen Nanodepot

*Zengwei Ran, †<sup>a</sup> Maolin Wang, †<sup>a</sup> Zhu Yuan,<sup>b</sup> Yan Zhang,<sup>\*b</sup> Guhuan Liu,<sup>\*a</sup> and*

*Ronghua Yang<sup>\*a</sup>*

<sup>a</sup>Key Laboratory of Chemical Biology & Traditional Chinese Medicine Research, Ministry of Education, Institute of Interdisciplinary Studies, College of Chemistry and Chemical Engineering, Hunan Normal University, Changsha, Hunan 410081, China.

\*E-mail: ghliu@hunnu.edu.cn and yangrh@pku.edu.cn.

<sup>b</sup>National & Local Joint Engineering Laboratory for New Petro-chemical Materials and Fine Utilization of Resources, Key Laboratory of Light Energy Conversion Materials of Hunan Province College, College of Chemistry and Chemical Engineering, Hunan Normal University, Changsha, Hunan 410081, China. \*E-mail:

zyzsxd@163.com.

† These authors contributed equally.

## Experimental Section

**Materials.** *N,N*-diethylaminoethyl methacrylate (DEAEMA) purchased from Aldrich was removed inhibitor by distillation under vacuum and stored at -20 °C prior to use. Dulbecco's modified Eagle's medium (DMEM, GIBCO) was used as received. Methanol, dioxane, tetrahydrofuran (THF), dimethylformamide (DMF), dimethyl sulfoxide (DMSO), and all other reagents were purchased from Adamas-beta and used as received. Water was deionized with a Milli-Q SP reagent water system (Millipore) to a specific resistivity of 18.4 MΩ cm. RAFT chain transfer agent PEG-CEP<sup>1</sup> was synthesized according to literature procedures.

### Sample Preparation.

*Synthesis of VBP.* Pyridin-2(1H)-one (10 mmol), 4-chloromethylstyrene (10 mmol), K<sub>2</sub>CO<sub>3</sub> (20 mmol), KI (10 mmol) and acetone (5 mL) were charged into a reaction flask, the mixture was refluxed for 12 h. After evaporating all the solvents, the residues were dissolved in CH<sub>2</sub>Cl<sub>2</sub>, successively washed with saturated aqueous NaCl and water, dried over anhydrous MgSO<sub>4</sub>, filtered, and then concentrated on a rotary evaporator. The crude product was subjected to further purification by silica gel column chromatography using ethyl acetate/petroleum ether as the eluent, affording 1-(4-vinylbenzyl)pyridin-2(1H)-one (VBP) as a white solid (67% yield). <sup>1</sup>H NMR (Figure S1, CDCl<sub>3</sub>, δ, ppm, TMS): 7.4 (6H, aromatic protons), 6.6 (1H, -CH=CH<sub>2</sub>), 5.7 (1H, -CH=CHH), 5.2 (1H, -CH=CHH), 5.1 (2H, -CH<sub>2</sub>-).

*Synthesis of PI-P4.* A reaction flask was charged with PEO-CEP (1 mmol), DEAEMA (0-30 mmol), VBP (45-60 mmol), AIBN (0.2 mmol) and dioxane (25 mL). The reaction system was deoxygenated and backfilled with nitrogen through three freeze-vacuum-thaw cycles. Polymerization was performed at 70 °C for 8 h. Monomers and other impurities were removed by precipitation three times in excess cold ether. The final polymer was dried in a vacuum oven overnight at room temperature to give a yellow sticky solid.

*RAFT End Group Removing of PI-P4 Block Copolymers.* A glass ampoule was charged with PI-P4 (100 mg), excess AIBN (5 mg), and DMSO (2 mL). The reaction system

was deoxygenated and backfilled with nitrogen through three freeze-vacuum-thaw cycles. After stirring at 70 °C for 2 h, the mixture was precipitated into an excess of diethyl ether for three times. The final product was dried in a vacuum oven overnight at room temperature to yield a white solid.

**Characterization.** Nuclear magnetic resonance (NMR) spectra were performed on a Bruker AV300 NMR 300 MHz spectrometer (samples dissolved in CDCl<sub>3</sub> or D<sub>2</sub>O). The molecular weight and molecular weight distribution of the block polymers and their precursors were determined by size exclusion chromatography (SEC) with a Waters 1515 pump and a Waters 2414 differential refractive index detector set at 30 °C. The SEC separation column used two Styragel columns (HR2 and HR4) at 45 °C and THF as eluent (flow rate 1.0 mL/min). Calibration was performed using a series of low polydispersity polystyrene standards. A Hitachi H-800 electron microscope was used to acquire transmission electron microscopy (TEM) images. The sample for TEM observations was prepared by placing 10 μL of dispersion of nanoparticle (0.5 g/L) on copper grids coated with thin films of Formvar and carbon successively. Confocal lasers scanning microscopy (CLSM) images were acquired using a Leica TCS SP5 microscope. Dynamic Laser Scattering (DLS) was measured using an ALV5000.

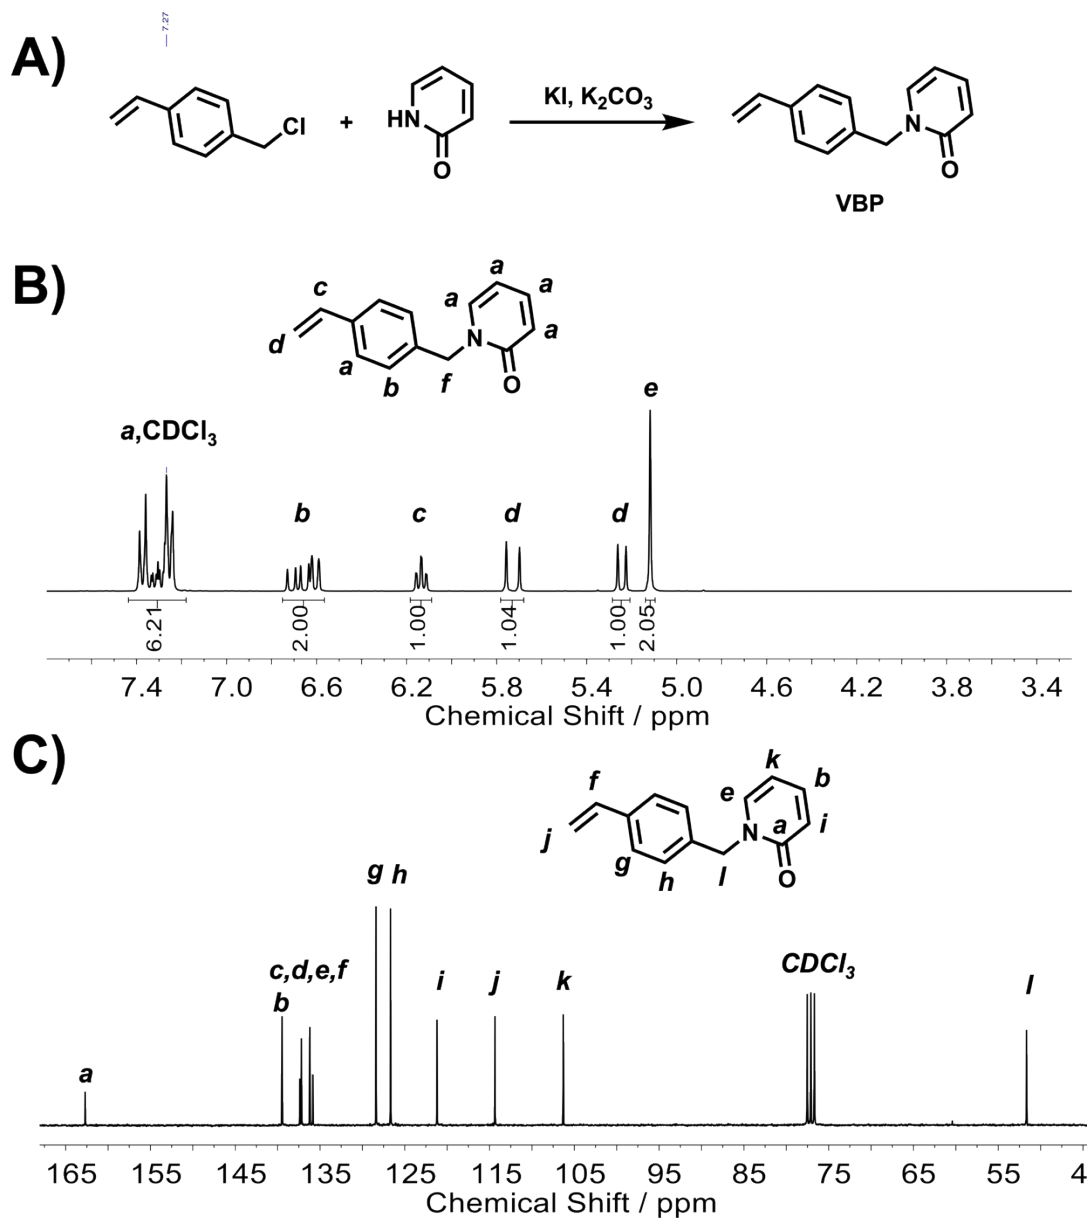

**Figure S1.** Synthetic schemes (A),  $^1\text{H}$  NMR (B), and  $^{13}\text{C}$  NMR (C) recorded for 1-(4-vinylbenzyl)pyridin-2(1H)-one (VBP).

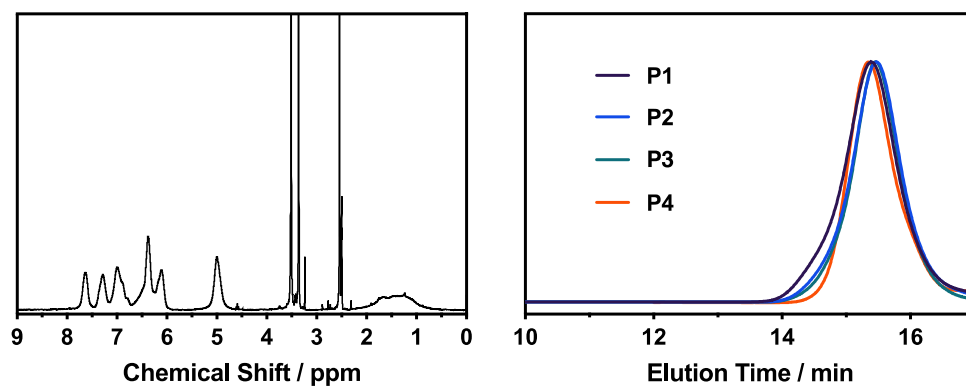

**Figure S2.**  $^1\text{H}$  NMR spectra recorded (left) and THF GPC traces (right) for **P1-P4**.

**Table S1. Molecular parameters of polymers.**

| <b>Entry</b> | <b><math>M_{n, \text{NMR}}</math><br/>(kDa)<sup>a</sup></b> | <b><math>M_{n, \text{GPC}}</math><br/>(kDa)<sup>b</sup></b> | <b><math>M_w/M_n</math><sup>b</sup></b> |
|--------------|-------------------------------------------------------------|-------------------------------------------------------------|-----------------------------------------|
| <b>P1</b>    | 15.0                                                        | 16.4                                                        | 1.20                                    |
| <b>P2</b>    | 13.3                                                        | 14.7                                                        | 1.21                                    |
| <b>P3</b>    | 13.5                                                        | 14.9                                                        | 1.23                                    |
| <b>P4</b>    | 13.8                                                        | 15.1                                                        | 1.24                                    |

<sup>a</sup> Calculated from <sup>1</sup>H NMR results. <sup>b</sup> Determined by GPC using THF as the eluent (1.0 mL/min).

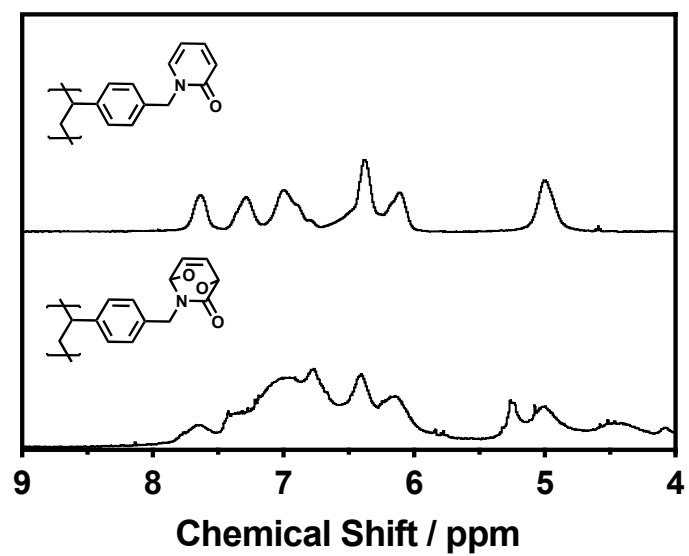

**Figure S3.** <sup>1</sup>H NMR spectra recorded in for **P1** before and after <sup>1</sup>O<sub>2</sub> loading.

**Table S2. The content of  $^1\text{O}_2$  loaded on OP1-OP4.**

| <b>Entry</b> | <b>Content of <math>^1\text{O}_2</math> loaded <sup>a</sup></b> |
|--------------|-----------------------------------------------------------------|
| <b>OP1</b>   | 51%                                                             |
| <b>OP2</b>   | 53%                                                             |
| <b>OP3</b>   | 62%                                                             |
| <b>OP4</b>   | 56%                                                             |

<sup>a</sup> Calculated from  $^1\text{H}$  NMR results.



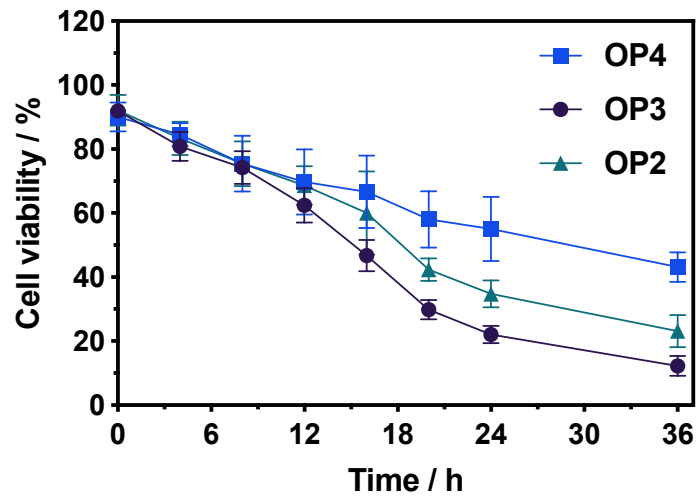

**Figure S4.** Time-dependent cytotoxicity of OP2-OP4 (0.1 g/L) to HepG2 cells by MTT assay.

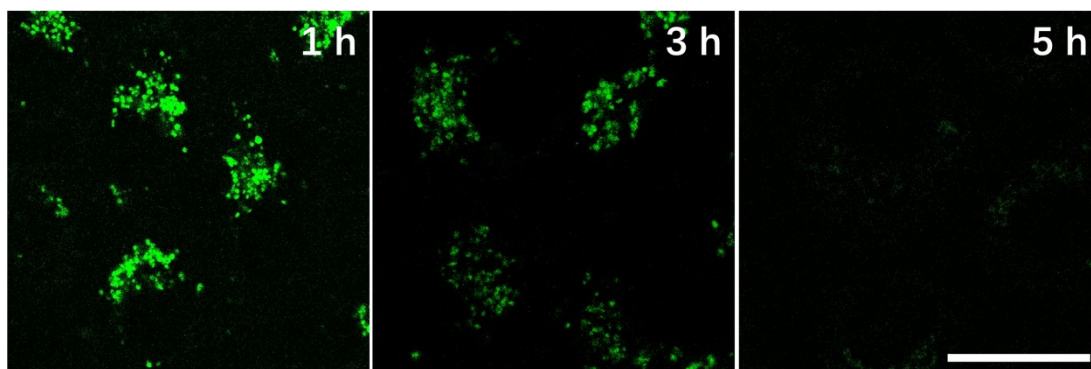

**Figure S5.** CLSM images of Lysotracker Green incubated with HepG2 cells after treating with **OP3** for varying times. Scale bar: 25  $\mu\text{m}$ .

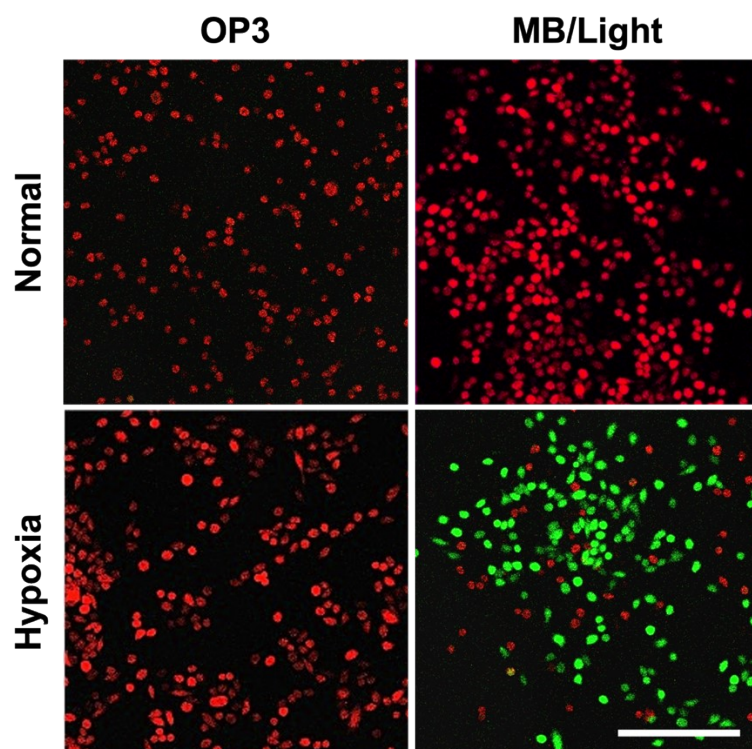

**Figure S6.** Live (green channel) / dead (red channel) assay with HepG2 cells incubated of **OP3** aSOND (0.1 g/L) and MB (10  $\mu$ M) based PDT under normal and hypoxia condition. Green and red channel emissions were collected at  $530 \pm 20$  nm and  $610 \pm 20$  nm, respectively. Scale bar: 100  $\mu$ m.

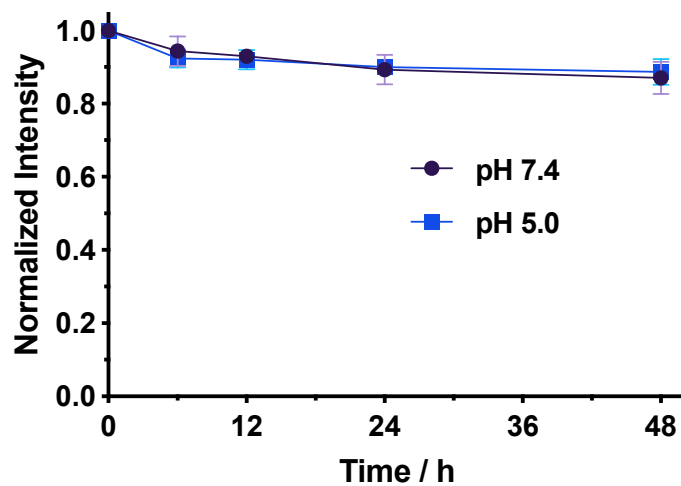

**Figure S7.** Fluorescence emission intensity for DOX ( $2 \mu\text{M}$ ,  $\lambda_{\text{ex}} = 540 \text{ nm}$ ) incubating with **OP3** ( $0.1 \text{ g/L}$ ) at pH 7.4 and 5.0.

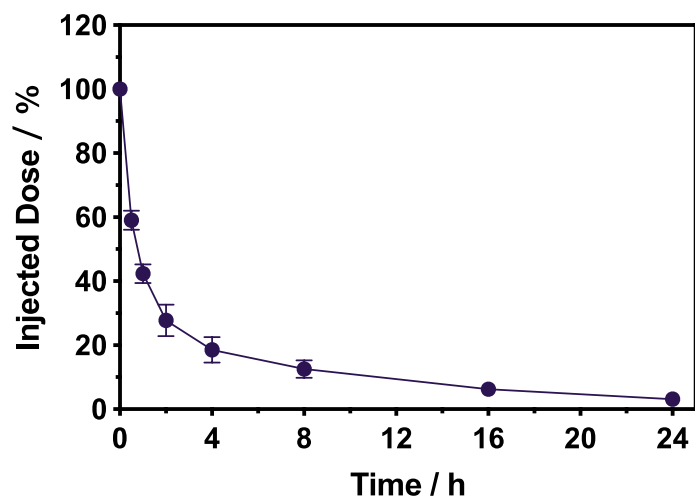

**Figure S8.** Time-dependent blood level upon tail vein injection of **OP5**, calculated as percentage of injected dose remaining in the blood.

- 1 Xu, X.; Flores, J. D.; McCormick, C. L. *Macromolecules*, 2011, **44**, 1327-1334.
